# Supplementary material for: Gold doping of tin clusters: exo-vs.endohedral complexes
Source: Royal Society of Chemistry journal article supplement (doi:10.1039/c9nr03233a), 2019-01-01
Supplement: c9nr03233a1.pdf [file c9nr03233a1.pdf]

Cite this: DOI: 00.0000/xxxxxxxxxx

## Supporting Information - Gold Doping of Tin Clusters: Exo- vs Endohedral Complexes<sup>†</sup>

Martin Gleditsch,<sup>\*a</sup> Lukáš F. Pašteka,<sup>b</sup> Daniel A. Götz<sup>a</sup>, Armin Shayeghi<sup>c</sup>, Roy L. Johnston<sup>d</sup> and Rolf Schäfer<sup>a</sup>

Received Date

Accepted Date

DOI: 00.0000/xxxxxxxxxx

We present molecular beam electric deflection experiments on neutral gold-doped tin clusters. The experimental  $\text{Sn}_N\text{Au}$  ( $N = 6 - 16$ ) cluster beam profiles are interpreted by means of classical trajectory simulations supplied, with cluster structures generated by a genetic algorithm based on density functional theory. The combined experimental and theoretical analysis confirms that at least nine tin atoms are necessary to form a cage that is capable of encapsulating a gold atom, with high symmetry only marginally distorted by the gold atom. Two-component DFT calculations reveal that spin-orbit effects are necessary to properly describe these species. Partial charge analysis methods predict the presence of charge transfer effects.

### 1 Electric Beam Deflection

An exemplary mass spectrum of gold-doped tin clusters for an alloy target (15 atom-% Au in Sn) at 20 K nozzle temperature is shown in Figure 1. The mass signals for  $N = 6 - 9$  are relatively small and difficult to stabilize during the beam deflection measurement. Starting with  $N = 10$ , the doped species display heightened intensities and are more stable during the deflection measurements. The species  $N = 10, 12$  display the highest signal intensity. This is also reflected in the relative stabilities of the predicted ground states, as seen in Figure 5. Larger as well as double-doped species are also abundant, but cannot be measured due to the low intensity in the beam and the broad isotopic distribution of tin. Figure 2 illustrates the influence of the rotational temperature on two electric beam deflection simulations. The influence is shown to be only minor in the range  $T_{\text{rot}} = 5 - 25$  K. Thus, the assumption  $T_{\text{rot}} = 10$  K is appropriate and employed for all simulations shown in the main text.

### 2 Quantum Chemistry

Figure 3 and 4 show all energetically low-lying isomers up to 0.5 eV for  $\text{Sn}_N\text{Au}$  with  $N = 6 - 16$ . All structures have been obtained by optimizing the GA generated candidates with density

functional theory (DFT) on the PBE0/cc-pVTZ-PP level of theory. All low lying structures were found to possess doublet multiplicity, as their corresponding quartet structures were at least 0.7 eV higher in energy. Their properties are summarized in table 1. The first column contains the label as shown in Figure 3 and 4.  $\Delta E$  refers to the energy relative with respect to the identified global minimum structure in eV, which is followed by the column for the point group symmetry (Symm.). The columns for the total magnitude of the electric dipole moment  $\mu_{\text{tot}}$  and its components  $\mu_i$  ( $i = x, y, z$ ) are displayed in Debye (D) and in the same molecular fixed frame like the moment of inertia components  $I_i$  ( $i = x, y, z$ ) (which are expressed with respect to the smallest component  $I_{\text{min}}$  in  $\text{kg m}^2 \cdot 10^{-44}$ ). The average binding energy  $E_b$  has been calculated by equation 1 and is shown together with the second order energy difference  $\Delta^2 E$  from equation 2 as well as  $\mu_{\text{tot}}$  in Figure 5. Starting with ten tin atoms, the average binding energy seems to approach a near constant value. This suggests that starting with ten tin atoms the gold-doped species display a heightened stability, which is reflected in the stability of the clusters during the electric deflection measurement. The second order energy differences further reveal, that  $\text{Sn}_{10}\text{Au}$  and  $\text{Sn}_{12}\text{Au}$  are especially stable from a quantum chemical perspective. This agrees well with the mass peak intensities, as the corresponding peaks display the highest signals of all doped clusters.

$$E_b = (E(\text{Sn}_{(N)}\text{Au}) - N \cdot E(\text{Sn}) - E(\text{Au})) / (N + 1) \quad (1)$$

$$\Delta^2 E = 2 \cdot E(\text{Sn}_{(N)}\text{Au}) - E(\text{Sn}_{(N+1)}\text{Au}) - E(\text{Sn}_{(N-1)}\text{Au}) \quad (2)$$

<sup>a</sup> Technische Universität Darmstadt, Eduard-Zintl-Institut, Alarich-Weiss-Straße 8, 64287 Darmstadt, Germany

<sup>b</sup> Department of Physical and Theoretical Chemistry & Laboratory for Advanced Materials, Faculty of Natural Sciences, Comenius University, Mlynská dolina, Ilkovičova 6, 84215 Bratislava, Slovakia

<sup>c</sup> Vienna Center for Quantum Science and Technology (VCQ), Faculty of Physics, University of Vienna, Boltzmanngasse 5, A-1090 Vienna, Austria

<sup>d</sup> School of Chemistry, University of Birmingham, Edgbaston, Birmingham B15 2TT, United Kingdom

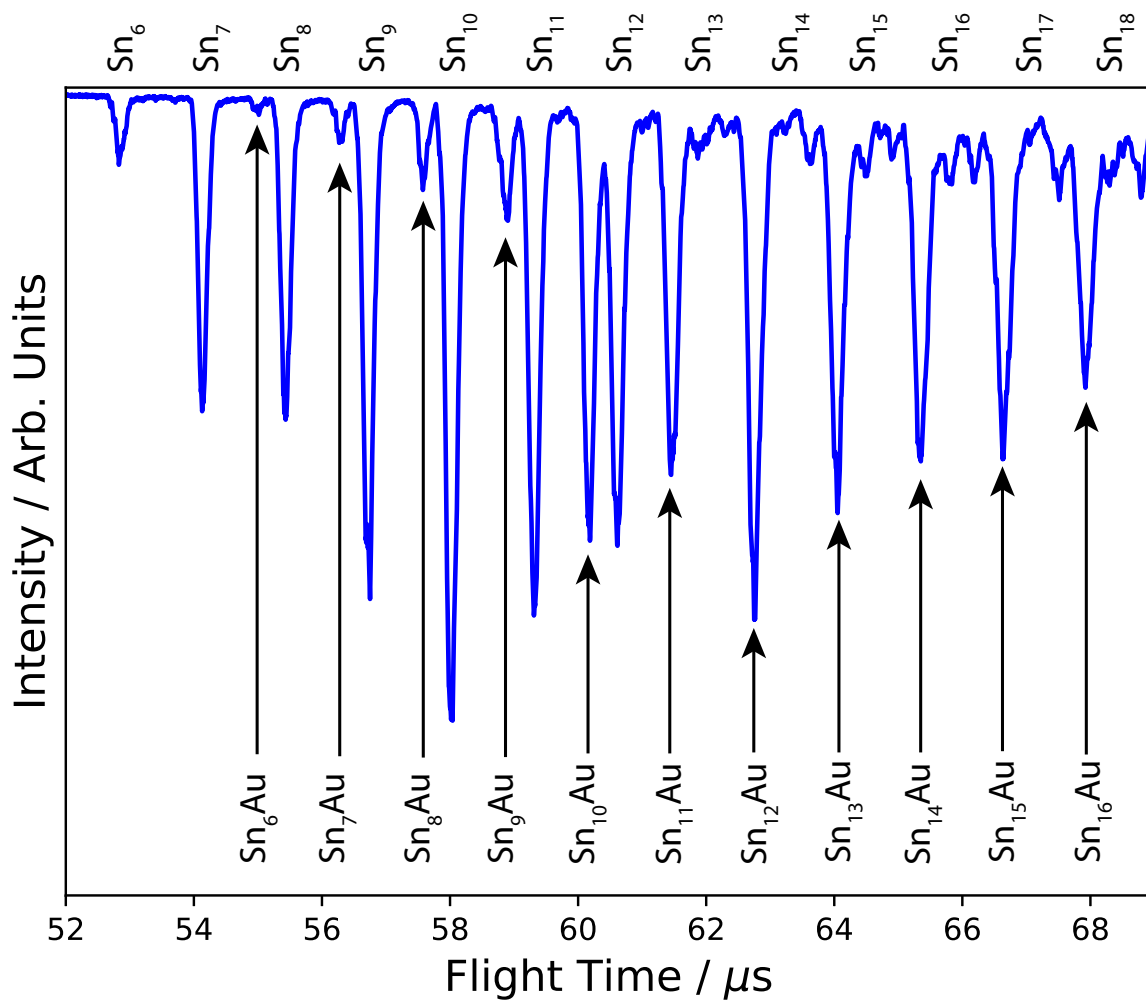

**Fig. 1** Mass spectrum of gold-doped tin clusters  $\text{Sn}_N\text{Au}$  for an alloy target (15 atom-% Au in Sn) at 20 K nozzle temperature. The mass signals for pure tin clusters are shown as reference. While the smaller doped species with  $N > 10$  display low intensities and are difficult to stabilize in deflection measurements, starting with  $N = 10$ , the doped species display heightened intensities and stability during the deflection measurements. The mass signals corresponding to  $N = 10, 12$  display the highest signal intensity of the doped species.

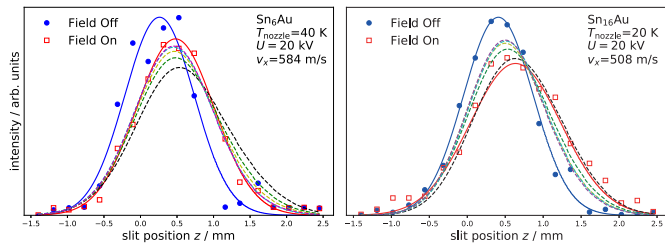

**Fig. 2** Comparison of experimental electric deflection results with field switched off (blue) and on (red) with the simulated beam profiles for different rotational temperatures ( $T_{rot}$ ). The influence on a rigid rotor is shown to be only minor in the range of 5-25 K. The colour notation is black (5 K), green (10 K), yellow (15 K), cyan (20 K) and magenta (25 K).

**Table 1** Results of the DFT studies for  $\text{Sn}_N\text{Au}$  on the PBE0/cc-pVTZ-PP level of theory. All structures have doublet spin multiplicity.

| Label   | $\Delta E/\text{eV}$ | Symm.        | $\mu_{tot}/D$ | $\mu_x/D$ | $\mu_y/D$ | $\mu_z/D$ | $\frac{I_{min}}{(\text{kg m}^2 \cdot 10^{-44})}$ | $I_x/I_{min}$ | $I_y/I_{min}$ | $I_z/I_{min}$ |
|---------|----------------------|--------------|---------------|-----------|-----------|-----------|--------------------------------------------------|---------------|---------------|---------------|
| 6-I     | 0.00                 | $C_{\infty}$ | 0.30          | 0.00      | 0.29      | 0.05      | 4.663                                            | 1.000         | 1.095         | 1.357         |
| 6-II    | 0.09                 | $C_{\infty}$ | 0.09          | -0.07     | -0.06     | 0.00      | 4.040                                            | 1.000         | 1.446         | 1.402         |
| 6-III   | 0.11                 | $C_{\infty}$ | 0.58          | 0.58      | 0.00      | 0.00      | 4.430                                            | 1.000         | 1.012         | 1.496         |
| 6-IV    | 0.33                 | $C_1$        | 0.20          | 0.05      | -0.10     | -0.17     | 3.489                                            | 1.000         | 1.880         | 2.192         |
| 6-V     | 0.42                 | $C_{\infty}$ | 1.19          | -1.17     | 0.00      | -0.16     | 4.118                                            | 1.000         | 1.395         | 1.545         |
| 7-I     | 0.00                 | $C_{\infty}$ | 0.39          | 0.38      | 0.00      | 0.09      | 5.019                                            | 1.000         | 1.480         | 1.832         |
| 7-II    | 0.27                 | $C_1$        | 0.31          | -0.10     | 0.04      | 0.28      | 5.099                                            | 1.000         | 1.640         | 1.365         |
| 7-III   | 0.31                 | $C_{\infty}$ | 0.80          | 0.58      | 0.00      | 0.55      | 5.362                                            | 1.000         | 1.198         | 1.528         |
| 8-I     | 0.00                 | $C_{\infty}$ | 0.08          | 0.00      | 0.04      | -0.07     | 6.022                                            | 1.000         | 1.448         | 1.643         |
| 8-II    | 0.01                 | $C_{\infty}$ | 0.32          | -0.10     | 0.00      | -0.30     | 6.891                                            | 1.000         | 1.300         | 1.353         |
| 8-III   | 0.04                 | $C_1$        | 0.24          | 0.00      | -0.22     | -0.09     | 5.866                                            | 1.000         | 2.152         | 1.841         |
| 8-IV    | 0.19                 | $C_{\infty}$ | 0.29          | -0.29     | 0.01      | 0.00      | 6.802                                            | 1.000         | 1.468         | 1.355         |
| 8-V     | 0.22                 | $C_2$        | 0.43          | 0.00      | 0.00      | -0.43     | 5.801                                            | 1.000         | 1.904         | 1.667         |
| 8-VI    | 0.22                 | $C_{\infty}$ | 0.36          | 0.06      | 0.00      | 0.35      | 6.621                                            | 1.000         | 1.162         | 1.538         |
| 8-VII   | 0.34                 | $C_1$        | 0.53          | 0.33      | 0.39      | -0.15     | 6.777                                            | 1.000         | 1.207         | 1.391         |
| 9-I     | 0.00                 | $C_{\infty}$ | 0.41          | 0.00      | 0.40      | 0.10      | 8.364                                            | 1.000         | 1.034         | 1.296         |
| 9-II    | 0.39                 | $C_{\infty}$ | 0.31          | 0.00      | -0.01     | 0.31      | 8.906                                            | 1.000         | 1.069         | 1.287         |
| 9-III   | 0.46                 | $C_1$        | 0.25          | 0.10      | -0.22     | -0.05     | 9.277                                            | 1.000         | 1.039         | 1.260         |
| 10-I    | 0.00                 | $D_{4d}$     | 0.00          | 0.00      | 0.00      | 0.00      | 9.973                                            | 1.000         | 1.076         | 1.076         |
| 11-I    | 0.00                 | $C_{\infty}$ | 0.24          | 0.00      | 0.11      | 0.21      | 11.691                                           | 1.000         | 1.072         | 1.137         |
| 11-II   | 0.27                 | $C_{\infty}$ | 0.66          | 0.64      | -0.17     | 0.00      | 10.625                                           | 1.000         | 1.277         | 1.423         |
| 11-III  | 0.41                 | $C_{2v}$     | 0.09          | 0.09      | 0.00      | 0.00      | 11.293                                           | 1.000         | 1.133         | 1.343         |
| 12-I    | 0.00                 | $D_{5d}$     | 0.00          | 0.00      | 0.00      | 0.00      | 14.023                                           | 1.000         | 1.000         | 1.029         |
| 13-I    | 0.00                 | $C_{\infty}$ | 0.93          | 0.89      | 0.00      | -0.27     | 14.483                                           | 1.000         | 1.244         | 1.256         |
| 13-II   | 0.24                 | $C_1$        | 0.91          | 0.85      | 0.24      | -0.21     | 13.164                                           | 1.000         | 1.456         | 1.602         |
| 13-III  | 0.49                 | $C_{\infty}$ | 1.36          | -1.28     | 0.00      | -0.45     | 13.432                                           | 1.000         | 1.434         | 1.515         |
| 13-IV   | 0.41                 | $C_{\infty}$ | 0.45          | 0.00      | -0.02     | 0.45      | 12.898                                           | 1.000         | 1.520         | 1.708         |
| 14-I    | 0.00                 | $C_{\infty}$ | 0.63          | 0.44      | 0.00      | 0.45      | 15.370                                           | 1.000         | 1.371         | 1.457         |
| 14-II   | 0.16                 | $C_{\infty}$ | 0.64          | -0.63     | 0.00      | -0.08     | 14.834                                           | 1.000         | 1.536         | 1.644         |
| 14-III  | 0.24                 | $C_2$        | 0.08          | 0.00      | 0.08      | 0.00      | 16.159                                           | 1.000         | 1.302         | 1.423         |
| 14-IV   | 0.28                 | $C_1$        | 0.73          | 0.70      | -0.11     | -0.18     | 15.469                                           | 1.000         | 1.397         | 1.491         |
| 14-V    | 0.32                 | $C_{\infty}$ | 1.22          | 1.21      | 0.09      | 0.00      | 17.309                                           | 1.000         | 1.094         | 1.336         |
| 14-VI   | 0.48                 | $C_1$        | 0.62          | -0.49     | 0.38      | -0.04     | 16.830                                           | 1.000         | 1.144         | 1.400         |
| 15-I    | 0.00                 | $C_{\infty}$ | 0.56          | 0.34      | 0.44      | 0.00      | 17.631                                           | 1.000         | 1.384         | 1.397         |
| 15-II   | 0.20                 | $C_{\infty}$ | 0.45          | 0.27      | 0.36      | 0.00      | 16.810                                           | 1.000         | 1.570         | 1.595         |
| 15-III  | 0.22                 | $C_1$        | 1.04          | -0.69     | 0.75      | 0.21      | 17.641                                           | 1.000         | 1.328         | 1.434         |
| 15-IV   | 0.24                 | $C_{\infty}$ | 1.15          | 1.14      | 0.00      | -0.10     | 15.576                                           | 1.000         | 1.795         | 1.819         |
| 15-V    | 0.28                 | $C_1$        | 1.59          | 1.48      | -0.53     | -0.28     | 19.012                                           | 1.000         | 1.161         | 1.365         |
| 15-VI   | 0.34                 | $C_{2v}$     | 0.24          | -0.24     | 0.00      | 0.00      | 20.428                                           | 1.000         | 1.006         | 1.157         |
| 15-VII  | 0.37                 | $C_1$        | 0.77          | 0.30      | 0.71      | -0.01     | 18.527                                           | 1.000         | 1.239         | 1.363         |
| 15-VIII | 0.38                 | $C_{2v}$     | 0.57          | 0.00      | 0.57      | 0.00      | 18.857                                           | 1.000         | 1.141         | 1.335         |
| 15-IX   | 0.46                 | $C_{\infty}$ | 0.61          | -0.53     | 0.00      | 0.30      | 18.721                                           | 1.000         | 1.215         | 1.384         |
| 16-I    | 0.00                 | $C_{\infty}$ | 0.38          | 0.05      | 0.00      | -0.38     | 18.214                                           | 1.000         | 1.584         | 1.637         |
| 16-II   | 0.05                 | $C_{\infty}$ | 0.45          | 0.00      | -0.09     | 0.44      | 20.354                                           | 1.000         | 1.275         | 1.483         |
| 16-III  | 0.11                 | $C_{\infty}$ | 0.65          | 0.49      | -0.42     | 0.00      | 23.458                                           | 1.000         | 1.083         | 1.105         |
| 16-IV   | 0.12                 | $C_1$        | 0.68          | 0.61      | -0.10     | 0.29      | 21.638                                           | 1.000         | 1.154         | 1.346         |
| 16-V    | 0.15                 | $C_2$        | 0.34          | -0.34     | 0.00      | 0.00      | 21.262                                           | 1.000         | 1.130         | 1.335         |
| 16-VI   | 0.16                 | $C_{\infty}$ | 1.47          | 1.38      | -0.49     | 0.00      | 18.058                                           | 1.000         | 1.744         | 1.749         |
| 16-VII  | 0.25                 | $C_{\infty}$ | 1.08          | 1.05      | 0.00      | -0.25     | 18.066                                           | 1.000         | 1.745         | 1.762         |

Furthermore, we present the results of different partial charge analysis methods in table 1. Here  $\delta_i$  are the partial charges and  $\rho_i$  the total spin density on the gold dopant. The employed methods are the 'density derived electrostatic and chemical approach' (DDEC6), Löwdin population analysis (Löw.), natural bond order analysis (NBO) and Bader charge (Bad.) analysis. Both the techniques based on partitioning of the electron density distribution and methods based on wave function analysis reveal negative par-

**Table 2** Results of the ground state partial charge analysis for  $\text{Sn}_N\text{Au}$  on the PBE0/cc-pVTZ-PP level of theory. Here  $\delta_i$  are the partial charges (or net atomic charges, NAC) and  $\rho_i$  the total spin density on the gold dopant for 'density derived Electrostatic and chemical approach' (DDEC6), Löwdin (Löw), Natural Charge (Nat) and Bader analysis, respectively. The endohedral structures ( $N > 8$ ) show increased partial charges at the location of the dopant as well as a vanishing spin density (with the exception of  $\text{Sn}_9\text{Au}$ ).

| $N$ | $\delta_{\text{DDEC6}}$ | $\rho_{\text{DDEC6}}$ | $\delta_{\text{Löw}}$ | $\rho_{\text{Löw}}$ | $\delta_{\text{NBO}}$ | $\rho_{\text{NBO}}$ | $\delta_{\text{Bad.}}$ |
|-----|-------------------------|-----------------------|-----------------------|---------------------|-----------------------|---------------------|------------------------|
| 6   | -0.02                   | 0.04                  | -0.23                 | -0.03               | -0.20                 | -0.03               | -0.52                  |
| 7   | -0.05                   | 0.22                  | -0.29                 | 0.08                | -0.15                 | 0.18                | -0.49                  |
| 8   | -0.15                   | 0.04                  | -0.32                 | 0.09                | -0.77                 | 0.03                | -0.75                  |
| 9   | -0.33                   | 0.09                  | -0.61                 | 0.11                | -2.13                 | 0.10                | -1.13                  |
| 10  | -0.29                   | 0.01                  | -0.73                 | 0.04                | -3.16                 | -0.04               | -1.45                  |
| 11  | -0.30                   | 0.00                  | -0.69                 | 0.02                | -2.75                 | -0.04               | -1.20                  |
| 12  | -0.28                   | -0.01                 | -0.69                 | 0.01                | -2.75                 | -0.04               | -1.14                  |
| 13  | -0.25                   | -0.01                 | -0.70                 | 0.00                | -2.65                 | 0.00                | -1.13                  |
| 14  | -0.27                   | -0.01                 | -0.67                 | 0.00                | -2.44                 | -0.01               | -1.11                  |
| 15  | -0.25                   | -0.01                 | -0.64                 | 0.01                | -2.34                 | 0.00                | -1.09                  |
| 16  | -0.25                   | -0.02                 | -0.67                 | -0.01               | -2.36                 | 0.00                | -1.07                  |

tial charges on the gold dopant. Thus, the gold dopant is inducing a negative charge transfer which is more pronounced for endohedral structures. Only the amount of the transferred charge can not be verified. Additionally, the total spin density displays consistent values for all applied techniques and with the exception of  $\text{Sn}_9\text{Au}$  all endohedral structures display a vanishing spin density at the gold dopant. This makes the spin density a further indication for the observed change in the structural motif.

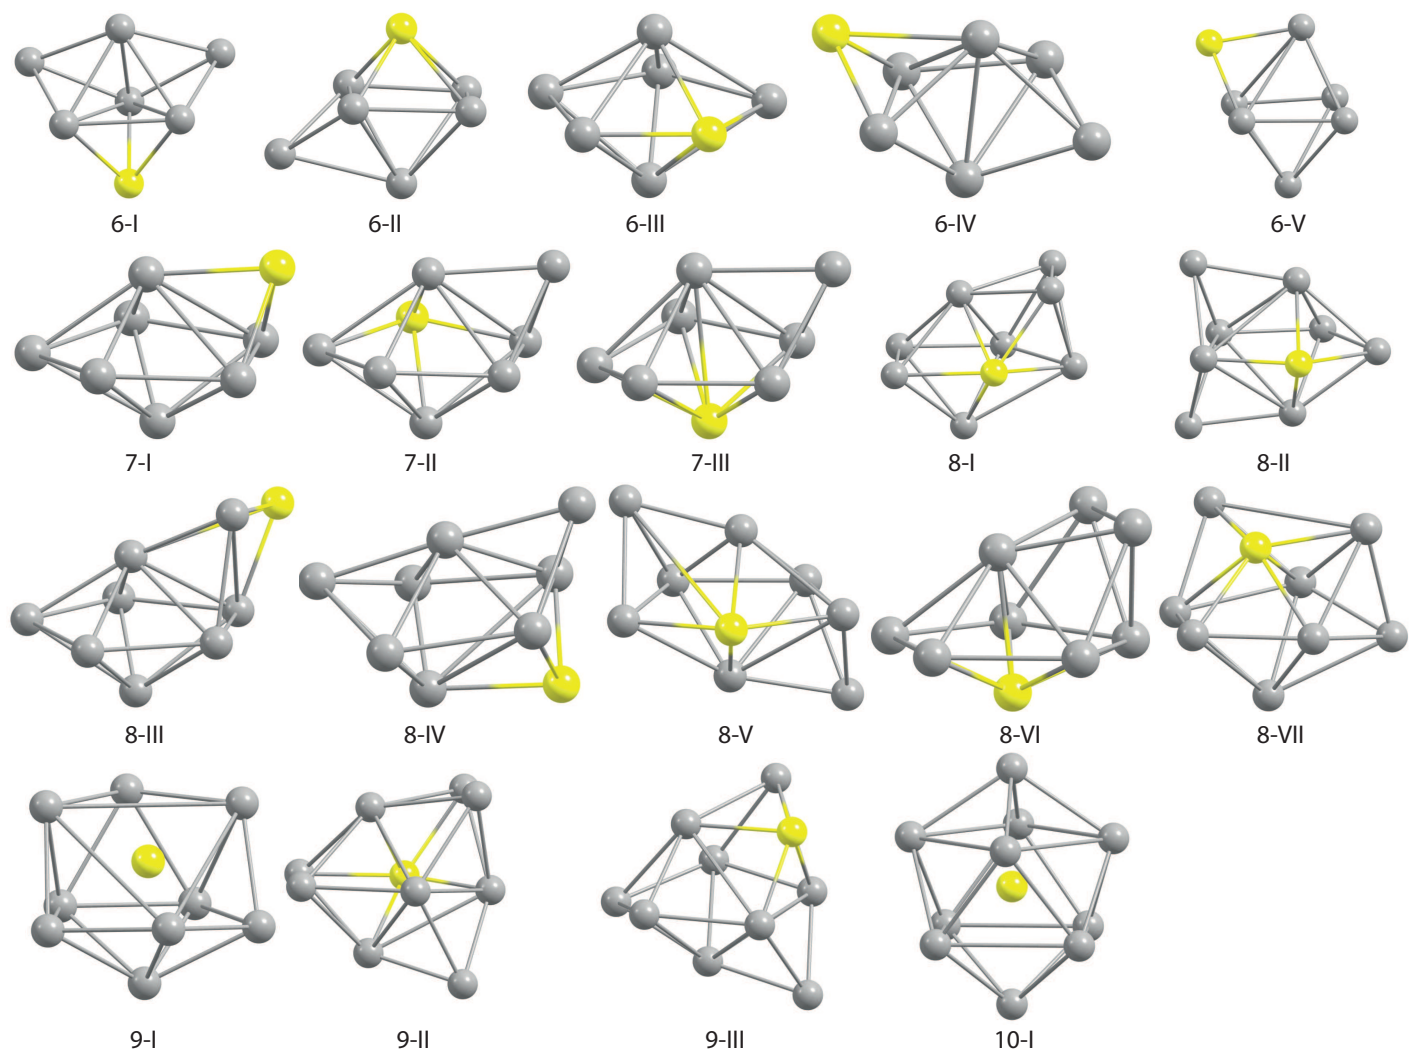

**Fig. 3** Energetically low-lying isomers up to 0.5 eV for the single-doped  $\text{Sn}_N\text{Au}$  clusters with  $N = 6 - 10$  as obtained at the PBE0/cc-pVTZ-PP level of theory with DFT. Below each structure, the number of tin atoms and the order of the isomer (roman numeral) is denoted. Their corresponding properties are summarized in table 1.

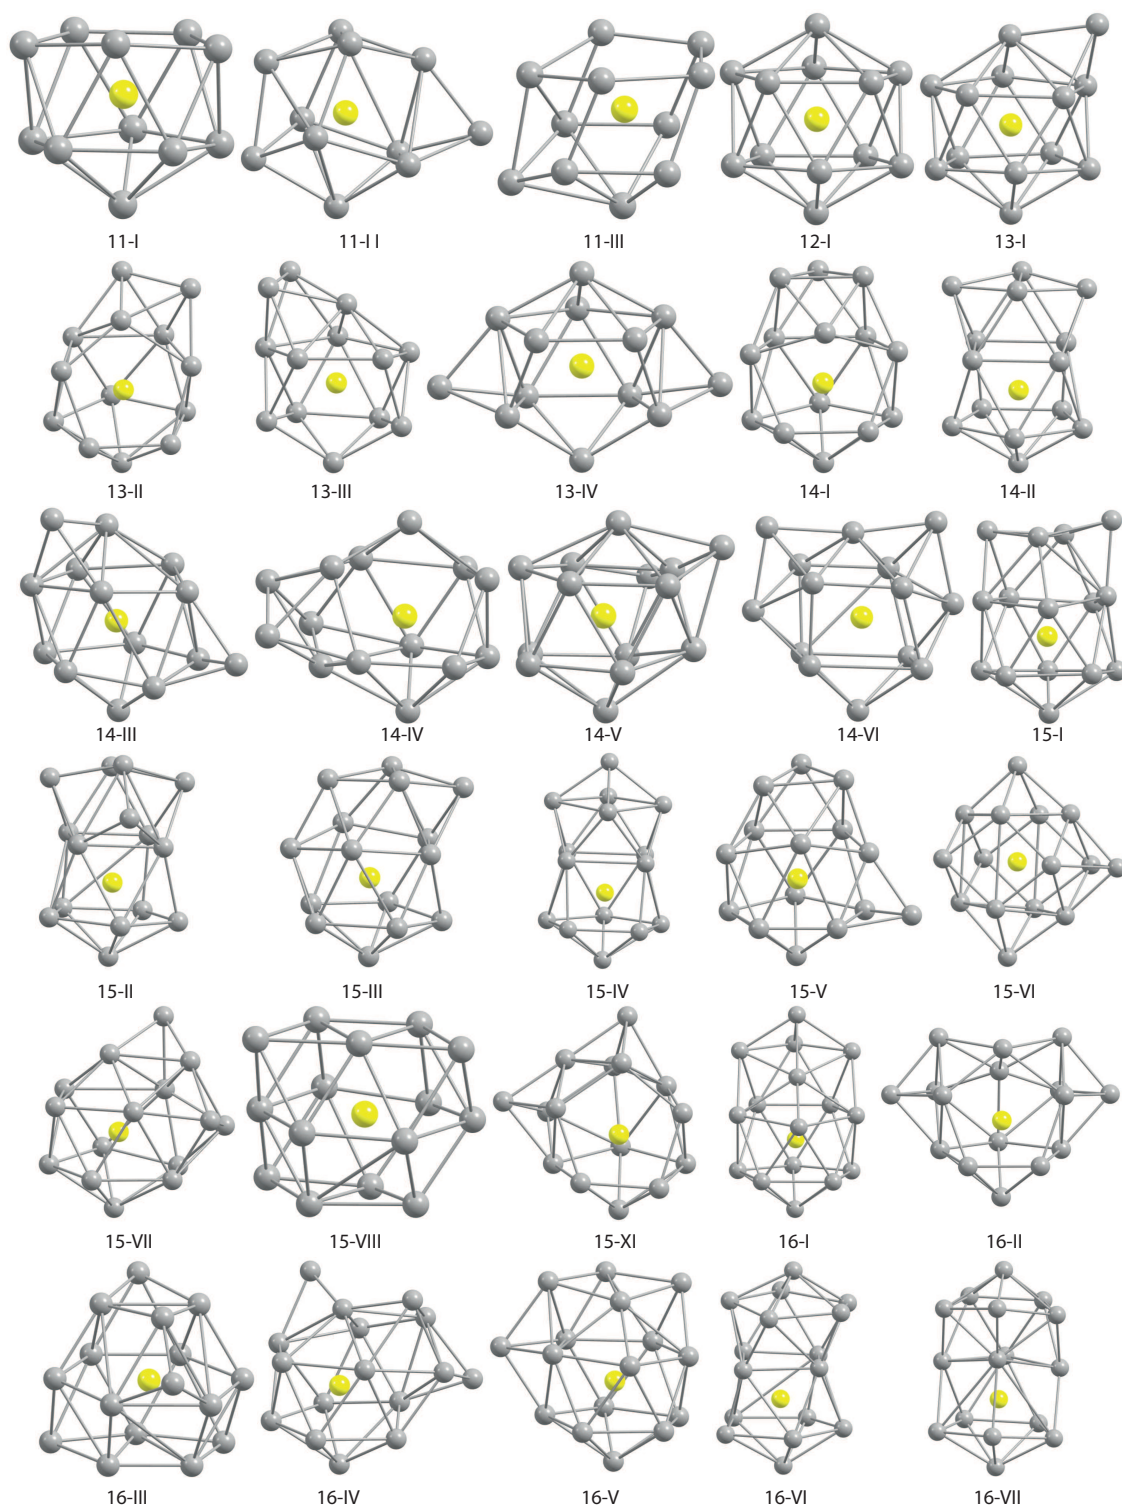

**Fig. 4** Energetically low-lying isomers up to 0.5 eV for the single-doped  $\text{Sn}_N\text{Au}$  clusters with  $N = 11 - 16$  as obtained at the PBE0/cc-pVTZ-PP level of theory with DFT. The notation is equivalent to Figure 4 Their corresponding properties are summarized in table 1.

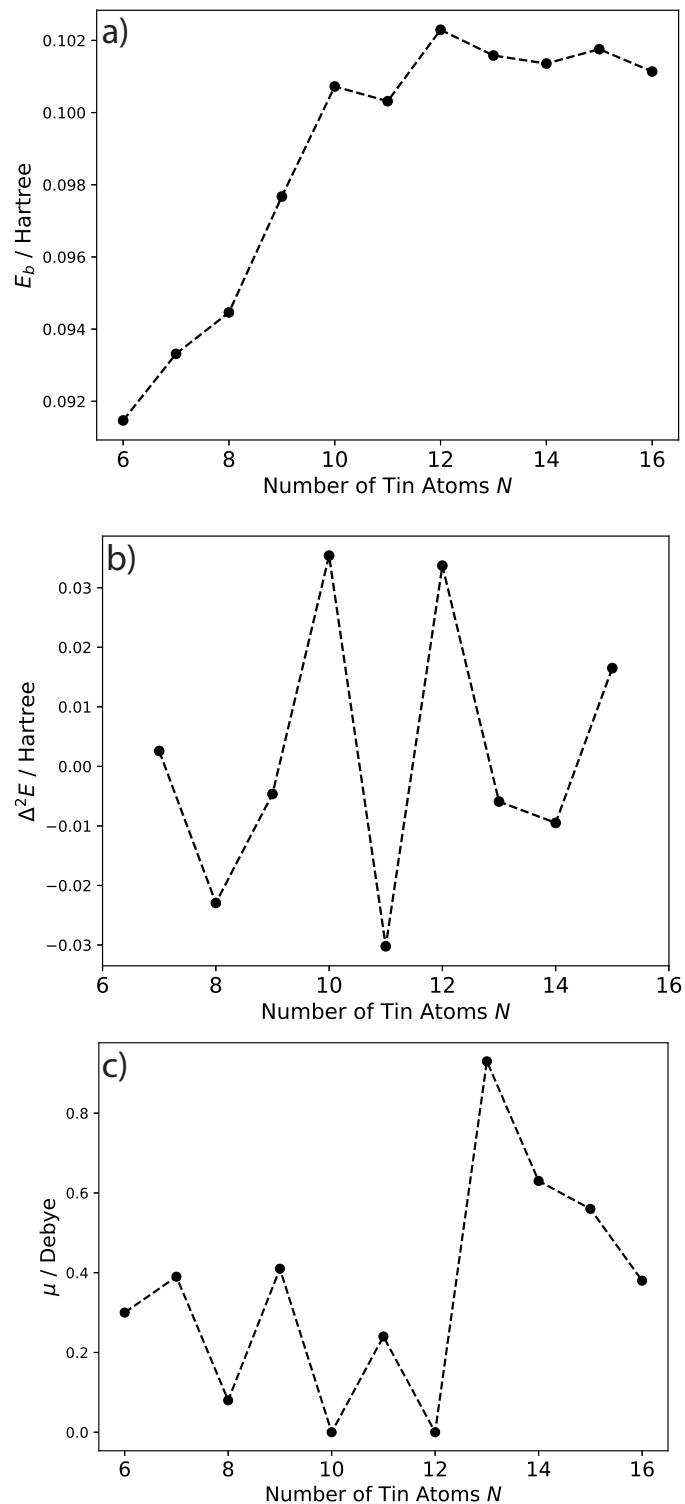

**Fig. 5** Subfigure (a) shows the average binding energy  $E_b$  as a function of the number of tin atoms  $N$ . Starting with ten tin atoms,  $E_b$  approaches a constant value. The second order energy difference  $\Delta^2 E$  in Subfigure (b) reveals that the species with ten and twelve tin atoms are especially stable. The dipole moment  $\mu$  in Subfigure (c) is insensitive to the structural transition from exohedral ( $N = 8$ ) to endohedral complexes ( $N = 9$ ). The species with ten and twelve tin atoms display vanishing dipole moments. The calculations have been done for the identified DFT ground states on the PBE0/cc-pVTZ-PP level of theory.
